# Supplementary material for: In Search of TGCT Biomarkers: A Comprehensive In Silico and Histopathological Analysis
Source: Dis Markers. 2020 Nov 6;2020:8841880. doi: 10.1155/2020/8841880 (PMC7666710; doi:10.1155/2020/8841880)
Supplement: Supplementary 3 — Supplementary data 3: STRING network and functional analysis results. Graph presenting network node, edge, and interaction analysis as well as all significant functional analysis terms (FDA < 0.05). [file 8841880.f3.xlsx]

## Sheet: network_stats
Supplementary data 3.
STRING network and functional analysis results. Graph presenting network node, edge, and interaction analysis as well as all significant functional analysis terms (FDA < 0.05).
number of nodes:
12
number of edges:
18
average node degree:
3
avg. local clustering coefficient:
0.539
expected number of edges:
2
PPI enrichment p-value:
1.98e-12

## Sheet: enrichment.Function
#term ID	term description	observed gene count	background gene count	false discovery rate	matching proteins in your network (IDs)	matching proteins in your network (labels)
GO:0043565	sequence-specific DNA binding	6	1047	0.0015	ENSP00000217086,ENSP00000229307,ENSP00000259915,ENSP00000297316,ENSP00000323588,ENSP00000343619	HOXA9,NANOG,POU5F1,SALL4,SOX17,SOX2
GO:0000981	DNA-binding transcription factor activity, RNA polymerase II-specific	6	1631	0.0039	ENSP00000217086,ENSP00000229307,ENSP00000259915,ENSP00000297316,ENSP00000323588,ENSP00000343619	HOXA9,NANOG,POU5F1,SALL4,SOX17,SOX2
GO:0003677	DNA binding	7	2457	0.0039	ENSP00000217086,ENSP00000229307,ENSP00000259915,ENSP00000297316,ENSP00000302111,ENSP00000323588,ENSP00000343619	HOXA9,MGMT,NANOG,POU5F1,SALL4,SOX17,SOX2
GO:0035198	miRNA binding	2	26	0.0039	ENSP00000259915,ENSP00000323588	POU5F1,SOX2
GO:0044212	transcription regulatory region DNA binding	5	829	0.0039	ENSP00000217086,ENSP00000229307,ENSP00000259915,ENSP00000297316,ENSP00000323588	NANOG,POU5F1,SALL4,SOX17,SOX2
GO:0001228	DNA-binding transcription activator activity, RNA polymerase II-specific	3	408	0.0147	ENSP00000229307,ENSP00000297316,ENSP00000323588	NANOG,SOX17,SOX2
GO:1901363	heterocyclic compound binding	8	5305	0.0343	ENSP00000217086,ENSP00000229307,ENSP00000259915,ENSP00000288135,ENSP00000297316,ENSP00000302111,ENSP00000323588,ENSP00000343619	HOXA9,KIT,MGMT,NANOG,POU5F1,SALL4,SOX17,SOX2
GO:0008134	transcription factor binding	3	610	0.0351	ENSP00000217086,ENSP00000259915,ENSP00000297316	POU5F1,SALL4,SOX17
GO:0097159	organic cyclic compound binding	8	5382	0.0351	ENSP00000217086,ENSP00000229307,ENSP00000259915,ENSP00000288135,ENSP00000297316,ENSP00000302111,ENSP00000323588,ENSP00000343619	HOXA9,KIT,MGMT,NANOG,POU5F1,SALL4,SOX17,SOX2
GO:0000976	transcription regulatory region sequence-specific DNA binding	3	710	0.0476	ENSP00000229307,ENSP00000259915,ENSP00000323588	NANOG,POU5F1,SOX2

## Sheet: enrichment.InterPro
#term ID	term description	observed gene count	background gene count	false discovery rate	matching proteins in your network (IDs)	matching proteins in your network (labels)
IPR017970	Homeobox, conserved site	3	186	0.0084	ENSP00000229307,ENSP00000259915,ENSP00000343619	HOXA9,NANOG,POU5F1
IPR001356	Homeobox domain	3	238	0.0086	ENSP00000229307,ENSP00000259915,ENSP00000343619	HOXA9,NANOG,POU5F1
IPR009057	Homeobox-like domain superfamily	3	300	0.0086	ENSP00000229307,ENSP00000259915,ENSP00000343619	HOXA9,NANOG,POU5F1
IPR009071	High mobility group box domain	2	53	0.0086	ENSP00000297316,ENSP00000323588	SOX17,SOX2
IPR036910	High mobility group box domain superfamily	2	54	0.0086	ENSP00000297316,ENSP00000323588	SOX17,SOX2

## Sheet: enrichment.KEGG
#term ID	term description	observed gene count	background gene count	false discovery rate	matching proteins in your network (IDs)	matching proteins in your network (labels)
hsa04550	Signaling pathways regulating pluripotency of stem cells	3	138	0.0016	ENSP00000229307,ENSP00000259915,ENSP00000323588	NANOG,POU5F1,SOX2
hsa04390	Hippo signaling pathway	2	152	0.0405	ENSP00000323588,ENSP00000349547	RASSF1,SOX2

## Sheet: enrichment.Keyword
#term ID	term description	observed gene count	background gene count	false discovery rate	matching proteins in your network (IDs)	matching proteins in your network (labels)
KW-0238	DNA-binding	7	1952	0.0031	ENSP00000217086,ENSP00000229307,ENSP00000259915,ENSP00000297316,ENSP00000302111,ENSP00000323588,ENSP00000343619	HOXA9,MGMT,NANOG,POU5F1,SALL4,SOX17,SOX2
KW-0217	Developmental protein	5	958	0.0052	ENSP00000229307,ENSP00000259216,ENSP00000259915,ENSP00000323588,ENSP00000343619	CFC1,HOXA9,NANOG,POU5F1,SOX2
KW-0371	Homeobox	3	240	0.0079	ENSP00000229307,ENSP00000259915,ENSP00000343619	HOXA9,NANOG,POU5F1
KW-0539	Nucleus	9	5200	0.01	ENSP00000217086,ENSP00000229307,ENSP00000259915,ENSP00000297316,ENSP00000302111,ENSP00000323588,ENSP00000343619,ENSP00000349547,ENSP00000354660	HOXA9,MAGEC2,MGMT,NANOG,POU5F1,RASSF1,SALL4,SOX17,SOX2
KW-0805	Transcription regulation	6	2279	0.0154	ENSP00000217086,ENSP00000229307,ENSP00000259915,ENSP00000297316,ENSP00000323588,ENSP00000343619	HOXA9,NANOG,POU5F1,SALL4,SOX17,SOX2
KW-0336	GPI-anchor	2	138	0.0283	ENSP00000005995,ENSP00000259216	CFC1,PRSS21
KW-9995	Disease	7	3799	0.0283	ENSP00000217086,ENSP00000259216,ENSP00000288135,ENSP00000297316,ENSP00000323588,ENSP00000343619,ENSP00000349547	CFC1,HOXA9,KIT,RASSF1,SALL4,SOX17,SOX2
KW-0010	Activator	3	670	0.0486	ENSP00000229307,ENSP00000297316,ENSP00000323588	NANOG,SOX17,SOX2

## Sheet: enrichment.Pfam
#term ID	term description	observed gene count	background gene count	false discovery rate	matching proteins in your network (IDs)	matching proteins in your network (labels)
PF00046	Homeobox domain	3	234	0.0068	ENSP00000229307,ENSP00000259915,ENSP00000343619	HOXA9,NANOG,POU5F1
PF00505	HMG (high mobility group) box	2	48	0.0068	ENSP00000297316,ENSP00000323588	SOX17,SOX2
PF09011	HMG-box domain	2	46	0.0068	ENSP00000297316,ENSP00000323588	SOX17,SOX2

## Sheet: enrichment.Process
#term ID	term description	observed gene count	background gene count	false discovery rate	matching proteins in your network (IDs)	matching proteins in your network (labels)
GO:0001714	endodermal cell fate specification	4	6	1.41e-08	ENSP00000229307,ENSP00000259915,ENSP00000297316,ENSP00000323588	NANOG,POU5F1,SOX17,SOX2
GO:0035019	somatic stem cell population maintenance	5	53	6.18e-08	ENSP00000217086,ENSP00000229307,ENSP00000259915,ENSP00000288135,ENSP00000323588	KIT,NANOG,POU5F1,SALL4,SOX2
GO:0007369	gastrulation	5	158	2.95e-06	ENSP00000229307,ENSP00000259216,ENSP00000259915,ENSP00000297316,ENSP00000323588	CFC1,NANOG,POU5F1,SOX17,SOX2
GO:0009790	embryo development	7	890	1.85e-05	ENSP00000217086,ENSP00000229307,ENSP00000259216,ENSP00000259915,ENSP00000288135,ENSP00000297316,ENSP00000323588	CFC1,KIT,NANOG,POU5F1,SALL4,SOX17,SOX2
GO:0048598	embryonic morphogenesis	6	545	2.47e-05	ENSP00000217086,ENSP00000229307,ENSP00000259216,ENSP00000259915,ENSP00000297316,ENSP00000323588	CFC1,NANOG,POU5F1,SALL4,SOX17,SOX2
GO:0060913	cardiac cell fate determination	2	4	0.00029	ENSP00000259915,ENSP00000297316	POU5F1,SOX17
GO:0051173	positive regulation of nitrogen compound metabolic process	9	2946	0.0003	ENSP00000217086,ENSP00000229307,ENSP00000259915,ENSP00000288135,ENSP00000297316,ENSP00000302111,ENSP00000323588,ENSP00000349547,ENSP00000354660	KIT,MAGEC2,MGMT,NANOG,POU5F1,RASSF1,SALL4,SOX17,SOX2
GO:0001824	blastocyst development	3	61	0.00035	ENSP00000217086,ENSP00000259915,ENSP00000297316	POU5F1,SALL4,SOX17
GO:0031325	positive regulation of cellular metabolic process	9	3060	0.00036	ENSP00000217086,ENSP00000229307,ENSP00000259915,ENSP00000288135,ENSP00000297316,ENSP00000302111,ENSP00000323588,ENSP00000349547,ENSP00000354660	KIT,MAGEC2,MGMT,NANOG,POU5F1,RASSF1,SALL4,SOX17,SOX2
GO:0010604	positive regulation of macromolecule metabolic process	9	3081	0.00037	ENSP00000217086,ENSP00000229307,ENSP00000259915,ENSP00000288135,ENSP00000297316,ENSP00000302111,ENSP00000323588,ENSP00000349547,ENSP00000354660	KIT,MAGEC2,MGMT,NANOG,POU5F1,RASSF1,SALL4,SOX17,SOX2
GO:0003307	regulation of Wnt signaling pathway involved in heart development	2	6	0.00038	ENSP00000259915,ENSP00000297316	POU5F1,SOX17
GO:0042659	regulation of cell fate specification	2	14	0.0014	ENSP00000259915,ENSP00000297316	POU5F1,SOX17
GO:0006366	transcription by RNA polymerase II	5	784	0.0022	ENSP00000217086,ENSP00000229307,ENSP00000259915,ENSP00000297316,ENSP00000323588	NANOG,POU5F1,SALL4,SOX17,SOX2
GO:0042789	mRNA transcription by RNA polymerase II	2	20	0.0025	ENSP00000259915,ENSP00000297316	POU5F1,SOX17
GO:0048646	anatomical structure formation involved in morphogenesis	5	831	0.0027	ENSP00000217086,ENSP00000229307,ENSP00000259915,ENSP00000297316,ENSP00000323588	NANOG,POU5F1,SALL4,SOX17,SOX2
GO:0048523	negative regulation of cellular process	9	4454	0.0051	ENSP00000217086,ENSP00000229307,ENSP00000259915,ENSP00000288135,ENSP00000297316,ENSP00000302111,ENSP00000323588,ENSP00000343619,ENSP00000349547	HOXA9,KIT,MGMT,NANOG,POU5F1,RASSF1,SALL4,SOX17,SOX2
GO:0009888	tissue development	6	1626	0.0052	ENSP00000217086,ENSP00000229307,ENSP00000259915,ENSP00000297316,ENSP00000302111,ENSP00000323588	MGMT,NANOG,POU5F1,SALL4,SOX17,SOX2
GO:0051171	regulation of nitrogen compound metabolic process	10	5827	0.0052	ENSP00000217086,ENSP00000229307,ENSP00000259915,ENSP00000288135,ENSP00000297316,ENSP00000302111,ENSP00000323588,ENSP00000343619,ENSP00000349547,ENSP00000354660	HOXA9,KIT,MAGEC2,MGMT,NANOG,POU5F1,RASSF1,SALL4,SOX17,SOX2
GO:0045595	regulation of cell differentiation	6	1695	0.0062	ENSP00000229307,ENSP00000259915,ENSP00000288135,ENSP00000297316,ENSP00000323588,ENSP00000343619	HOXA9,KIT,NANOG,POU5F1,SOX17,SOX2
GO:0080090	regulation of primary metabolic process	10	5982	0.0062	ENSP00000217086,ENSP00000229307,ENSP00000259915,ENSP00000288135,ENSP00000297316,ENSP00000302111,ENSP00000323588,ENSP00000343619,ENSP00000349547,ENSP00000354660	HOXA9,KIT,MAGEC2,MGMT,NANOG,POU5F1,RASSF1,SALL4,SOX17,SOX2
GO:0007275	multicellular organism development	9	4726	0.0067	ENSP00000217086,ENSP00000229307,ENSP00000259216,ENSP00000259915,ENSP00000288135,ENSP00000297316,ENSP00000302111,ENSP00000323588,ENSP00000343619	CFC1,HOXA9,KIT,MGMT,NANOG,POU5F1,SALL4,SOX17,SOX2
GO:0031323	regulation of cellular metabolic process	10	6082	0.0067	ENSP00000217086,ENSP00000229307,ENSP00000259915,ENSP00000288135,ENSP00000297316,ENSP00000302111,ENSP00000323588,ENSP00000343619,ENSP00000349547,ENSP00000354660	HOXA9,KIT,MAGEC2,MGMT,NANOG,POU5F1,RASSF1,SALL4,SOX17,SOX2
GO:0045935	positive regulation of nucleobase-containing compound metabolic process	6	1770	0.0067	ENSP00000217086,ENSP00000229307,ENSP00000259915,ENSP00000297316,ENSP00000302111,ENSP00000323588	MGMT,NANOG,POU5F1,SALL4,SOX17,SOX2
GO:0060255	regulation of macromolecule metabolic process	10	6072	0.0067	ENSP00000217086,ENSP00000229307,ENSP00000259915,ENSP00000288135,ENSP00000297316,ENSP00000302111,ENSP00000323588,ENSP00000343619,ENSP00000349547,ENSP00000354660	HOXA9,KIT,MAGEC2,MGMT,NANOG,POU5F1,RASSF1,SALL4,SOX17,SOX2
GO:0060828	regulation of canonical Wnt signaling pathway	3	218	0.0067	ENSP00000259915,ENSP00000297316,ENSP00000323588	POU5F1,SOX17,SOX2
GO:0006357	regulation of transcription by RNA polymerase II	7	2633	0.0068	ENSP00000217086,ENSP00000229307,ENSP00000259915,ENSP00000288135,ENSP00000297316,ENSP00000323588,ENSP00000343619	HOXA9,KIT,NANOG,POU5F1,SALL4,SOX17,SOX2
GO:0045944	positive regulation of transcription by RNA polymerase II	5	1104	0.0068	ENSP00000217086,ENSP00000229307,ENSP00000259915,ENSP00000297316,ENSP00000323588	NANOG,POU5F1,SALL4,SOX17,SOX2
GO:0010628	positive regulation of gene expression	6	1826	0.0072	ENSP00000217086,ENSP00000229307,ENSP00000259915,ENSP00000288135,ENSP00000297316,ENSP00000323588	KIT,NANOG,POU5F1,SALL4,SOX17,SOX2
GO:0032501	multicellular organismal process	10	6507	0.0094	ENSP00000005995,ENSP00000217086,ENSP00000229307,ENSP00000259216,ENSP00000259915,ENSP00000288135,ENSP00000297316,ENSP00000302111,ENSP00000323588,ENSP00000343619	CFC1,HOXA9,KIT,MGMT,NANOG,POU5F1,PRSS21,SALL4,SOX17,SOX2
GO:1903507	negative regulation of nucleic acid-templated transcription	5	1220	0.0094	ENSP00000217086,ENSP00000229307,ENSP00000259915,ENSP00000297316,ENSP00000323588	NANOG,POU5F1,SALL4,SOX17,SOX2
GO:0051253	negative regulation of RNA metabolic process	5	1303	0.011	ENSP00000217086,ENSP00000229307,ENSP00000259915,ENSP00000297316,ENSP00000323588	NANOG,POU5F1,SALL4,SOX17,SOX2
GO:0019219	regulation of nucleobase-containing compound metabolic process	8	4133	0.013	ENSP00000217086,ENSP00000229307,ENSP00000259915,ENSP00000288135,ENSP00000297316,ENSP00000302111,ENSP00000323588,ENSP00000343619	HOXA9,KIT,MGMT,NANOG,POU5F1,SALL4,SOX17,SOX2
GO:0007166	cell surface receptor signaling pathway	6	2198	0.0146	ENSP00000229307,ENSP00000259216,ENSP00000259915,ENSP00000288135,ENSP00000297316,ENSP00000323588	CFC1,KIT,NANOG,POU5F1,SOX17,SOX2
GO:0000122	negative regulation of transcription by RNA polymerase II	4	809	0.0148	ENSP00000217086,ENSP00000259915,ENSP00000297316,ENSP00000323588	POU5F1,SALL4,SOX17,SOX2
GO:0071310	cellular response to organic substance	6	2219	0.0148	ENSP00000229307,ENSP00000259915,ENSP00000288135,ENSP00000297316,ENSP00000302111,ENSP00000323588	KIT,MGMT,NANOG,POU5F1,SOX17,SOX2
GO:0051247	positive regulation of protein metabolic process	5	1587	0.0207	ENSP00000288135,ENSP00000297316,ENSP00000323588,ENSP00000349547,ENSP00000354660	KIT,MAGEC2,RASSF1,SOX17,SOX2
GO:0051254	positive regulation of RNA metabolic process	5	1596	0.0209	ENSP00000217086,ENSP00000229307,ENSP00000259915,ENSP00000297316,ENSP00000323588	NANOG,POU5F1,SALL4,SOX17,SOX2
GO:0030154	cell differentiation	7	3457	0.0212	ENSP00000217086,ENSP00000229307,ENSP00000259915,ENSP00000288135,ENSP00000297316,ENSP00000302111,ENSP00000323588	KIT,MGMT,NANOG,POU5F1,SALL4,SOX17,SOX2
GO:0043170	macromolecule metabolic process	10	7453	0.0212	ENSP00000005995,ENSP00000217086,ENSP00000229307,ENSP00000259915,ENSP00000288135,ENSP00000297316,ENSP00000302111,ENSP00000323588,ENSP00000343619,ENSP00000354660	HOXA9,KIT,MAGEC2,MGMT,NANOG,POU5F1,PRSS21,SALL4,SOX17,SOX2
GO:0071345	cellular response to cytokine stimulus	4	953	0.0229	ENSP00000229307,ENSP00000288135,ENSP00000297316,ENSP00000323588	KIT,NANOG,SOX17,SOX2
GO:0031398	positive regulation of protein ubiquitination	2	113	0.0237	ENSP00000349547,ENSP00000354660	MAGEC2,RASSF1
GO:0007165	signal transduction	8	4738	0.0241	ENSP00000217086,ENSP00000229307,ENSP00000259216,ENSP00000259915,ENSP00000288135,ENSP00000297316,ENSP00000323588,ENSP00000349547	CFC1,KIT,NANOG,POU5F1,RASSF1,SALL4,SOX17,SOX2
GO:0007368	determination of left/right symmetry	2	115	0.0241	ENSP00000259216,ENSP00000297316	CFC1,SOX17
GO:0006351	transcription, DNA-templated	6	2569	0.0245	ENSP00000217086,ENSP00000229307,ENSP00000259915,ENSP00000297316,ENSP00000323588,ENSP00000343619	HOXA9,NANOG,POU5F1,SALL4,SOX17,SOX2
GO:0090090	negative regulation of canonical Wnt signaling pathway	2	123	0.0253	ENSP00000297316,ENSP00000323588	SOX17,SOX2
GO:0048565	digestive tract development	2	126	0.0256	ENSP00000288135,ENSP00000297316	KIT,SOX17
GO:0051716	cellular response to stimulus	9	6212	0.0256	ENSP00000217086,ENSP00000229307,ENSP00000259216,ENSP00000259915,ENSP00000288135,ENSP00000297316,ENSP00000302111,ENSP00000323588,ENSP00000349547	CFC1,KIT,MGMT,NANOG,POU5F1,RASSF1,SALL4,SOX17,SOX2
GO:0007283	spermatogenesis	3	490	0.0257	ENSP00000005995,ENSP00000288135,ENSP00000297316	KIT,PRSS21,SOX17
GO:0007507	heart development	3	485	0.0257	ENSP00000217086,ENSP00000259915,ENSP00000297316	POU5F1,SALL4,SOX17
GO:0048863	stem cell differentiation	2	131	0.0257	ENSP00000288135,ENSP00000297316	KIT,SOX17
GO:0051246	regulation of protein metabolic process	6	2668	0.0257	ENSP00000288135,ENSP00000297316,ENSP00000302111,ENSP00000323588,ENSP00000349547,ENSP00000354660	KIT,MAGEC2,MGMT,RASSF1,SOX17,SOX2
GO:0044260	cellular macromolecule metabolic process	9	6413	0.028	ENSP00000217086,ENSP00000229307,ENSP00000259915,ENSP00000288135,ENSP00000297316,ENSP00000302111,ENSP00000323588,ENSP00000343619,ENSP00000354660	HOXA9,KIT,MAGEC2,MGMT,NANOG,POU5F1,SALL4,SOX17,SOX2
GO:0001667	ameboidal-type cell migration	2	146	0.029	ENSP00000288135,ENSP00000297316	KIT,SOX17
GO:2000026	regulation of multicellular organismal development	5	1876	0.0291	ENSP00000259915,ENSP00000288135,ENSP00000297316,ENSP00000323588,ENSP00000343619	HOXA9,KIT,POU5F1,SOX17,SOX2
GO:0007050	cell cycle arrest	2	149	0.0293	ENSP00000323588,ENSP00000349547	RASSF1,SOX2
GO:0051252	regulation of RNA metabolic process	7	3890	0.0294	ENSP00000217086,ENSP00000229307,ENSP00000259915,ENSP00000288135,ENSP00000297316,ENSP00000323588,ENSP00000343619	HOXA9,KIT,NANOG,POU5F1,SALL4,SOX17,SOX2
GO:0021915	neural tube development	2	154	0.03	ENSP00000217086,ENSP00000297316	SALL4,SOX17
GO:0031401	positive regulation of protein modification process	4	1149	0.0302	ENSP00000288135,ENSP00000323588,ENSP00000349547,ENSP00000354660	KIT,MAGEC2,RASSF1,SOX2
GO:0090304	nucleic acid metabolic process	7	3941	0.0302	ENSP00000217086,ENSP00000229307,ENSP00000259915,ENSP00000297316,ENSP00000302111,ENSP00000323588,ENSP00000343619	HOXA9,MGMT,NANOG,POU5F1,SALL4,SOX17,SOX2
GO:0048513	animal organ development	6	2926	0.0324	ENSP00000217086,ENSP00000259915,ENSP00000288135,ENSP00000297316,ENSP00000302111,ENSP00000323588	KIT,MGMT,POU5F1,SALL4,SOX17,SOX2
GO:0050821	protein stabilization	2	166	0.0324	ENSP00000297316,ENSP00000349547	RASSF1,SOX17
GO:0006807	nitrogen compound metabolic process	10	8349	0.0344	ENSP00000005995,ENSP00000217086,ENSP00000229307,ENSP00000259915,ENSP00000288135,ENSP00000297316,ENSP00000302111,ENSP00000323588,ENSP00000343619,ENSP00000354660	HOXA9,KIT,MAGEC2,MGMT,NANOG,POU5F1,PRSS21,SALL4,SOX17,SOX2
GO:0051302	regulation of cell division	2	179	0.0362	ENSP00000259915,ENSP00000297316	POU5F1,SOX17
GO:0007178	transmembrane receptor protein serine/threonine kinase signaling pathway	2	189	0.0392	ENSP00000259216,ENSP00000259915	CFC1,POU5F1
GO:0051094	positive regulation of developmental process	4	1286	0.0398	ENSP00000259915,ENSP00000288135,ENSP00000297316,ENSP00000323588	KIT,POU5F1,SOX17,SOX2
GO:0050794	regulation of cellular process	11	10484	0.0408	ENSP00000217086,ENSP00000229307,ENSP00000259216,ENSP00000259915,ENSP00000288135,ENSP00000297316,ENSP00000302111,ENSP00000323588,ENSP00000343619,ENSP00000349547,ENSP00000354660	CFC1,HOXA9,KIT,MAGEC2,MGMT,NANOG,POU5F1,RASSF1,SALL4,SOX17,SOX2
GO:0019221	cytokine-mediated signaling pathway	3	655	0.0416	ENSP00000229307,ENSP00000288135,ENSP00000323588	KIT,NANOG,SOX2
GO:2000027	regulation of animal organ morphogenesis	2	207	0.0435	ENSP00000259915,ENSP00000297316	POU5F1,SOX17
GO:0008283	cell population proliferation	3	676	0.044	ENSP00000217086,ENSP00000229307,ENSP00000288135	KIT,NANOG,SALL4
GO:0043281	regulation of cysteine-type endopeptidase activity involved in apoptotic process	2	209	0.044	ENSP00000302111,ENSP00000323588	MGMT,SOX2
GO:0045596	negative regulation of cell differentiation	3	683	0.0447	ENSP00000297316,ENSP00000323588,ENSP00000343619	HOXA9,SOX17,SOX2
GO:0007167	enzyme linked receptor protein signaling pathway	3	698	0.0464	ENSP00000259216,ENSP00000259915,ENSP00000288135	CFC1,KIT,POU5F1
GO:0044238	primary metabolic process	10	8808	0.0464	ENSP00000005995,ENSP00000217086,ENSP00000229307,ENSP00000259915,ENSP00000288135,ENSP00000297316,ENSP00000302111,ENSP00000323588,ENSP00000343619,ENSP00000354660	HOXA9,KIT,MAGEC2,MGMT,NANOG,POU5F1,PRSS21,SALL4,SOX17,SOX2

## Sheet: enrichment.RCTM
#term ID	term description	observed gene count	background gene count	false discovery rate	matching proteins in your network (IDs)	matching proteins in your network (labels)
HSA-2892247	POU5F1 (OCT4), SOX2, NANOG activate genes related to proliferation	4	12	6.01e-09	ENSP00000217086,ENSP00000229307,ENSP00000259915,ENSP00000323588	NANOG,POU5F1,SALL4,SOX2
HSA-2892245	POU5F1 (OCT4), SOX2, NANOG repress genes related to differentiation	3	3	7.21e-08	ENSP00000229307,ENSP00000259915,ENSP00000323588	NANOG,POU5F1,SOX2
HSA-1266738	Developmental Biology	5	1023	0.0024	ENSP00000217086,ENSP00000229307,ENSP00000259216,ENSP00000259915,ENSP00000323588	CFC1,NANOG,POU5F1,SALL4,SOX2
HSA-3769402	Deactivation of the beta-catenin transactivating complex	2	41	0.0025	ENSP00000297316,ENSP00000323588	SOX17,SOX2
HSA-6785807	Interleukin-4 and Interleukin-13 signaling	2	106	0.0131	ENSP00000229307,ENSP00000323588	NANOG,SOX2
HSA-1257604	PIP3 activates AKT signaling	2	242	0.0482	ENSP00000217086,ENSP00000288135	KIT,SALL4

## Sheet: enrichment.SMART
#term ID	term description	observed gene count	background gene count	false discovery rate	matching proteins in your network (IDs)	matching proteins in your network (labels)
SM00389	Homeodomain	3	241	0.005	ENSP00000229307,ENSP00000259915,ENSP00000343619	HOXA9,NANOG,POU5F1
SM00398	high mobility group	2	50	0.005	ENSP00000297316,ENSP00000323588	SOX17,SOX2
